# Supplementary material for: Nusinersen rescues taurine deficiency in severe Spinal Muscular Atrophy
Source: Research Square preprint supplement (doi:10.21203/rs.3.rs-6566128/v1), 2025-07-23
Supplement: Supplementary file 1 [file 1b97c3cfe4f345ef2275c2c0.docx]

*Supplementary information for*

**Nusinersen rescues taurine deficiency in severe Spinal Muscular Atrophy**

Raffaella di Vito1,2*, Amber Hassan1,3*, Tommaso Nuzzo1,2, Anna Caretto4,5, Chiara Panicucci6, Claudio Bruno6,7, Enrico Bertini 8, Adele D’Amico8, Alessandro Vercelli4,5, Marina Boido4,5, Francesco Errico1,9, Livio Pellizzoni10,11,12,Alessandro Usiello1,2,3,@

1Laboratory of Translational Neuroscience, Ceinge Biotecnologie Avanzate, 80145, Naples, Italy

2Department of Environmental, Biological and Pharmaceutical Science and Technologies, University of Campania "Luigi Vanvitelli", 81100, Caserta, Italy

3European School of Molecular medicine, University of Milan, 20122, Milan, Italy

4Department of Neuroscience “Rita Levi Montalcini”, University of Turin, 10126, Turin, Italy

5Neuroscience Institute Cavalieri Ottolenghi, University of Turin, 10043, Orbassano (TO), Italy

6Center of Translational and Experimental Myology, IRCCS Istituto Giannina Gaslini, 16147, Genova, Italy

7Department of Neuroscience, Rehabilitation, Ophthalmology, Genetics, Maternal, and Child Health - DINOGMI, University of Genova, 16132, Genova, Italy

8Unit of Neuromuscular and Neurodegenerative Disorders, Dept. Neurosciences, Bambino Gesu' Children's Hospital IRCCS, 00165, Roma, Italy.

9Department of Agricultural Sciences, University of Naples “Federico II”, 80055, Portici, Italy

10 Department of Neurology, Columbia University, 10032, New York, NY, USA.

11Center for Motor Neuron Biology and Disease, Columbia University, 10032, New York, NY, USA.

12Department of Pathology and Cell Biology, Columbia University, 10032, New York, NY, USA.

*These authors contributed equally to this work.

@Alessandro Usiello, Ph.D.: Department of Environmental, Biological and Pharmaceutical Sciences and Technologies, University of Campania “Luigi Vanvitelli”, Via A. Vivaldi, 43, 81100 Caserta, Italy, and CEINGE Biotecnologie Avanzate, Naples, Italy; Phone: +39 0813737879, email: [usiello@ceinge.unina.it](mailto:usiello@ceinge.unina.it).

**Suppl. Table 1**. Age-dependent decrease of taurine levels in the CNS of wild type (WT) and SMA mice from P1 to P12.

|  |  |  | |
| --- | --- | --- | --- |
|  |  | | [Taurine]  median (IQR)  P1 | | [Taurine]  median (IQR)  P5 | [Taurine]  median (IQR)  P12 | Kruskall Wallis  *p-*value | Dunn's multiple comparisons with Bonferroni correction  *p-*value |
| Brainstem | WT | | 180.3 (158.1-191.6) | | 112.2 (101.7-136.6) | 93.13 (83.75-103.2) | < **0.0001** | P1 vs P12: *p* = **0.0005** |
| SMA | | 161.3 (157.9-181.9) | | 114.6 (101.8-144.0) | 71.23 (70.46-82.28) | **< 0.0001** | P1 vs P12: *p* < **0.0001** |
| Spinal cord | WT | | 122.6 (96.94-106.5) | | 94.26 (93.74-109.2) | 71.73 (61.64-84.17) | < **0.0001** | P1 vs P12: *p* = **0.0011** |
| SMA | | 144.2 (106.5-154.7) | | 96.35 (87.36-108.7) | 67.62 (65.46-76.40) | **< 0.0001** | P1 vs P12: *p* = **0.0002** |
| Cortex | WT | | 241.1 (231.9-248.5) | | 227.4 (206.4-235.7) | 160.0 (153.8-170.6) | < **0.0001** | P1 vs P12: *p* = **0.0004** |
| SMA | | 241.9 (207.7-254.0) | | 216.5 (200.8-223.9) | 158.9 (152.3-165.1) | < **0.0001** | P1 vs P12: *p* = **0.0009** |
| Cerebellum | WT | | 176.5 (155.4-230.3) | | 156.2 (147.5-169.6) | 131.4 (123.4-146.5) | **0.0009** | P1 vs P12: *p* = **0.0023** |
| SMA | | 181.3 (155.0-199.7) | | 138.6 (134.1-156.1) | 125.3 (122.1-129.0) | **0.0010** | P1 vs P12: *p* = **0.0023** |

Taurine concentration is expressed as nmol/mg of protein and reported as median (IQR).

**Suppl. Table 2**. Gastrostomy, NIV, or tracheostomy in SMA1 or SMA2 patients do not influence taurine concentration in the CSF.

|  | **Non-invasive ventilation** | | | | | **Tracheostomy** | | | | | | | **Gastrostomy** | | | | | | | |
| --- | --- | --- | --- | --- | --- | --- | --- | --- | --- | --- | --- | --- | --- | --- | --- | --- | --- | --- | --- | --- |
|  | No | | Yes | |  | No | | Yes | | |  | | No | | Yes | | |  | |
|  | N | Median (IQR) | N | Median  (IQR) | *p-value* | N | Median (IQR) | | N | Median (IQR) | | *p-value* | N | Median (IQR) | | N | Median (IQR) | | *p-value* | |
| SMA1 (Taurine (μM)) | 7 | 8.60  (5.84-9.17) | 6 | 6.06  (4.94-10.78) | 0.836 | 8 | 7.67  (5.54-9.98) | | 5 | 5.84  (5.69-8.60) | | 0.524 | 3 | 8.92  (6.15-9.17) | | 10 | 6.13  (4.94-10.78) | | 0.573 | |
| SMA2 (Taurine (μM)) | 9 | 9.57  (8.98-16.31) | 5 | 12.82  (12.82-17.45) | 0.518 |  |  | | | | | |  | | | | | | | |

Data are expressed as median (IQR). *P*-values refers to Mann-Whitney test.
